# Supplementary material
Source: Springer Nature journal article supplement (https://www.springermedizin.de/resource/supplementary/13024_2011_182_MOESM1_ESM.pdf/9643604)

C.elegans APL-1 1 -----MTVGKLMGLLIPILVATVYAEGS-----PAGSKRHEKFIEMVAFSCGYRNOYMTTEE-GSWK  
Drosophila APPL 1 -----MCAALRRNLLLRSLWVYLAIGTAQV-----QAASPRWEPQIAVLCEAGIYQPYLSEGRWV  
Zebrafish APPa 1 -----MRSRELFLLMAVASTLAVEVP-----SDSGTG-LLAEPQIAMFCGKLNMMHNTIQSGKWE  
Xenopus APP-A 1 -----MLP-HITLLVLTAG-ALALEVP-----ADGNGG-LLAEPQIAMFCGKLNMMHNVQNGKWE  
hAPP 1 -----MLP-GLALLLLAAWTAARLEVP-----TDGNAG-LLAEPQIAMFCGKLNMMHNVQNGKWD  
hAPLP1 1 MGPA SPAARGLSRRPGQPPLPLLLPLLLLRAQPAIGSLAG-----GSPGAAEAPGSAQVAGLCGRLLTHRDLRTRGRWE  
hAPLP2 1 MAATGTAAA-----AATGRLLLLLVLGTAPALALAGYIEALAAAGTGFAVAEPQIAMFCGKLNMMHVNITQTKWE

C.elegans APL-1 57 TDDERYAT--CFSGKLDILKYCRKAAPSMNITNIVEYSEHVSISDWCRE--EGS--PCKWTHSVRPHYCIGDFEHSSEAL  
Drosophila APPL 59 TDLSSKKTGPTCLRDKMDLLDYCKKAYPNRDI TNIVESSHYQKIGGWCRGALNAACKGSHRWIKPFRCLG-PFQSDAL  
Zebrafish APPa 55 PDPSSGSKS--CIGNKEGILQYQCEYYPELQITNVVEANQPVS IWDWCKK--SRK-QCRSHMHIVVYRCLVGEFVSDAL  
Xenopus APP-A 53 TDVSGTKG--CIGTKEGILQYQCEYYPELQITNVVEANQPVTIQNWCKK--GRK-QCKSRTHIVVYRCLVGEFVSDAL  
hAPP 54 SDPSGKT--CIDTKEGILQYQCEYYPELQITNVVEANQPVTIQNWCKR--GRK-QCKTHPHFVIVYRCLVGEFVSDAL  
hAPLP1 76 PDPQRSRR--CLRDPGRVLEYCRQMYPELOIARVEGATQAIPIERWCGG--SRSGSCAHPHQVVPFRCLPGEFVSEAL  
hAPLP2 72 PDPGTGK--CFETKEEVLQYQCEYYPELQITNVVEANQVSIQNWCKR--DKK-QCKSR--FVTPFKCLVGEFVSDVL

C.elegans APL-1 130 QVPHDCQFHVNSRDQNDYQHWKDEAGCKTKKSKGNKDMI VRSFAVLEPCALDMFTGVEFVCCPNDQTKNTDQVQTKK  
Drosophila APPL 138 LVPFGCLFDHIIHNASRCWPFWRWNQTGAACQER-----GMQMRSFAMLLPCGIVSFGVEFVCCPKHFKTDEIHVKKT  
Zebrafish APPa 129 LVPDKCKFLHQERMDQCESHLHWHTVAKESGGDR-----SMNLHDYGMLLPCGIDFRGVEFVCCP-ADAGKESESAVA  
Xenopus APP-A 127 LVPDKCKFLHQERMDQCEHLLHWHTVAKESGSEK-----SMSLEYGMLLPCGIDKFRGVEFVCCP-SEESFSDADA  
hAPP 128 LVPDKCKFLHQERMDQCEHLLHWHTVAKETGSEK-----STNLHDYGMLLPCGIDKFRGVEFVCCP-LEESDNVSDADA  
hAPLP1 151 LVPFGCFLHQERMDQCESSTRRHQEAQEAQSSQ-----GLLIHSGMLLPCGSDRFRGVEVCCPPPGTDP--SGTA  
hAPLP2 144 LVPFKCQDFHKERMEVCENHCHWHTVYKCAQLTC-----GMTLVYGMLLPCGVDDQFHGTEVYCCPQTKIIGSVSKEEE

C.elegans APL-1 210 EDEDD--DDEDDAYEDDSEDEKDE-----  
Drosophila APPL 212 DLPVMPAAQINSANDELVMNDEDSNDSNYSKDANEDDLDEDDLMGDDEEDMVADEAATAGGSPNTGSSGDSNSGSLD  
Zebrafish APPa 202 EEDSDVVMGGADADYDENSMTDRDAEAAPVLEDEDADEEEDDQDGGDRDEKIEEEE-----EPE  
Xenopus APP-A 201 E-DDSDVVMGGADADYDRSDDKAVEAQPDEEEVEVEEETDDEDD--GDEAEEPE-----EY  
hAPP 202 EEDSDVVMGGADADYADGSEDKVVEVA--EEEEVAVEEEDDDEDEDEGVEEAA-----EY  
hAPLP1 223 VGDPSSTRSWPPGSR-----VEGADEEEEFSPQVDDYFVPEPQ-----A  
hAPLP2 218 EDEEEEEEDEEDYDVYKSEFPTTEAD--LDFTEAAVDEDEDEEE--GEVVEEDRY--YDTFKGD

C.elegans APL-1 235 -----EESPQDPYFKIANWNTNEHDDFKKAEARMDEKHKRKKVDMKMEWGTLETNYNE  
Drosophila APPL 372 AFVAAANSNGSGTG-----AGAPPSTAQPTSDPYTFHDFPHYEQSYKVSQRLEESHREKVTRVMKDWSDLEEKYOD  
Zebrafish APPa 345 GVL-----PTSSPPDAVDRYLETFADENEHAHFLQAKESLETKHREMSQVMREWEAERQAKS  
Xenopus APP-A 341 SVI-----PATAASTPDADVKYLENPNDENEHDRLKAKERLEKHKREMSQVMREWEAERQAKN  
hAPP 343 SANSSQLLKTTOEPLARDPVKLPPTTAASTPDADVKYLENPNDENEHAHFLQAKERLEKHKREMSQVMREWEAERQAKN  
hAPLP1 283 KVT-----PTPRPTDGDVIFYGMPGEISEHEGFLRAKMDLEEARMRQINEMVREWAMAQNSKN  
hAPLP2 362 AMIP-----PTPLPTNDVDFYFETSADNEHARFKAKEQLEIRHRNRMDRVKKEWEEAELQAKN

C.elegans APL-1 289 QKADPKGAEFKLSQMNARFOKTVSLEEEHKMRKEIEAVHEERVQAMLNEKKRDATHDYRQALATHVNKFNKHSVLQS  
Drosophila APPL 444 MRLADPKAAQSFKQRMARFQTSVDALEEGNAEKHQLAAMHQORVLAHINQRKREMTCTYQALTEQ--PNAHHVEKC  
Zebrafish APPa 406 LPND-----KKAVIQHFQEKVEALEQESASERQQLVETHMARVEALNDRRLALESYISALQADP--PRPRHVFSL  
Xenopus APP-A 402 LPKAD-----KKAVIQHFQEKVESLEQEAANERQQLVETHMARVEAMLNDRRLALENYITALQADP--PRPRHVFM  
hAPP 423 LPKAD-----KKAVIQHFQEKVESLEQEAANERQQLVETHMARVEAMLNDRRLALENYITALQADP--PRPRHVFM  
hAPLP1 342 LPKAD-----RQALNEHFQSLQTLLEEQVSGERORLVETHATRVIALINDORRALEGFALALQADP--PQAEVLLA  
hAPLP2 422 LPKAE-----RQTLIQHFQAMVKALEKEAASEKQQLVETHLARVEAMLNDRRLMALENYLALQADP--PRPHRLQA

C.elegans APL-1 369 LKAYIRAEKDRMHTLNRYRHLLKADS----KEAAYKPTVIHRLRYIDLRINGTLAMLRDFDLEKYVRIAVTYWKDY  
Drosophila APPL 522 LQKLLRALHKDRAHALAHYRHLLNSGGPGLKAAASERPTLERLIDIDRAVNSQMTMLKRYPELSAKIAQLMNDYILAL  
Zebrafish APPa 477 LKKYVRAEQKDRQHTLKHFEHVRMVDP----KKAQIRPQVTLHLRVIERMNQSLGLLYKVPVAVDIDQDV-ELQRE  
Xenopus APP-A 473 LKKYVRAEQKDRQHTLKHFEHVRMVDP----KKAQIRSQVMTHLVRINERMNQSFLLYKVPVAVAEIQDEVDELQKE  
hAPP 494 LKKYVRAEQKDRQHTLKHFEHVRMVDP----KKAQIRSQVMTHLVRINERMNQSFLLYNVPVAVAEIQDEVDELQKE  
hAPLP1 413 LRRYLRAEQKDRQHTLRHYQHVAVDP----EKAQMRFOVHTLQVIERVNSQSLGLLNDONPHLAQLRPIQELLHSE  
hAPLP2 493 LRRYVRAENKDRLHTLRHYQHVAVDP----EKAQMKSQVMTHLHVIERRNQSLSLLYKVPVAVAEIQEDELLEQED

C.elegans APL-1 445 RDEVSPDLSVEDSELTPII-----HDDEFKNAKLDVKAPTTAKPVKE  
Drosophila APPL 602 RSKDDIPGSSLGMSEEAAGILDKYRVEIERKVAEKERLRLAEKORKEQRAAEREKLRREKLRLEAKKVDMLKQSAVEQ  
Zebrafish APPa 552 QEMSACLANLQS-----DARVSYGNDALMP--DS  
Xenopus APP-A 549 QNYSDDMYSNMYS-----DHRVSYGNDALMPSLET  
hAPP 570 QNYSDDVLANMIS-----EPRIYSGNDALMPSLET  
hAPLP1 489 HLGPSLEAPAPG-----GSEDKGLQPP--DS  
hAPLP2 569 RADMDDQFTASISETPV-----DVRVSESEEEIPP-FHP

C.elegans APL-1 489 TDNAKVLPTASDSEEADEYYEDEDEEQVKKTPDKMKK-VKVVDIKPKIKEKVTIEEEKKAPKLVETSVQTDDEDDDEDS  
Drosophila APPL 682 QSQPTQSSTQSQAQQKESLPGKELGPDALVTAANPLETTKSEKDLSDTEYGEATVSSTKVQTVLPTVDDDDVQRA  
Zebrafish APPa 580 TAGLELLPAED--TQGFIFHP-ESFNQP-----NTHNQ-VEPVDARP-----VPDLDL  
Xenopus APP-A 580 KTTVELLPVVG--EFNIEDLQVWHSFGVDSVPAANTENE-VEPVDARP-----AADRGL  
hAPP 601 KTTVELLRVNG--EFLDLDLPWHSFGVDSVPAANTENE-VEPVDARP-----AADRGL  
hAPLP1 516 KDDTPMLTPKG--STQDAASP-----EKEKMP-LEQYERKV-----NASVP  
hAPLP2 602 FHPFPALENE--DTQPELYHP--MKKSGVGVGEQDGG-LIGAEKV-----INSK--

C.elegans APL-1 568 SSTSSEDEDEDKNIKELRVDIEPIIDEPASFYRHDKLIQSPVEERSASVYFQPYLASAMFITAICIFAFITNARRR  
Drosophila APPL 762 VEDVAAAHQEAEPQVGHFMTHDLGHRSSFLRREFAQHAHAKEGRNVYFTLSFAGJALMAAVFVGAFAKWRSTRS  
Zebrafish APPa 625 ATRPVSGUK--PDDIPELRMAEERHS-----EVYHOKLVFAEDVSSNKGAIIGLMVGGVVIAITVIVITLVMRL-KKQYT  
Xenopus APP-A 630 TTRPGSGLTNIKTEEISEVKMDESEYRHDATYEVHOKLVFAEDVSSNKGAIIGLMVGGVVIAITVIVITLVMRL-KKQYT  
hAPP 651 TTRPGSGLTNIKTEEISEVKMDEAFRHDSSTYEVHOKLVFAEDVSSNKGAIIGLMVGGVVIAITVIVITLVMRL-KKQYT  
hAPLP1 555 -----RGFPFHS-----EIQDELAPAGTGM--REAVSGLLIMGAGGSLIYLSMILLRKKKPYG  
hAPLP2 646 -NKVDENVIDETLDYKEMIFNAERVGG--LEERESVGPLREDFLSALIGLLVIAVAIATVIVISLVMRL-KRQYG

C.elegans APL-1 648 RAMRGFEVD-----VYTPPEERHVMGMQVNGYENPTYSFFDSKA-  
Drosophila APPL 842 PHAOGFEVDQNVTTTHPIVREEXIIPMNOQINGYENPTYKYFVEKE-  
Zebrafish APPa 698 SHHGIEVDA-----AVTPEERHLSKMQQNGYENPTYKFFEQMHN  
Xenopus APP-A 709 THHGVEVDA-----AVTPEERHLSKMQQNGYENPTYKFFEQMHN  
hAPP 730 SHHGVEVDA-----AVTPEERHLSKMQQNGYENPTYKFFEQMHN  
hAPLP1 611 AISHGVVEVDP-----MLTLEEQQLRELQRHGYENPTYRFLEERP-  
hAPLP2 723 TISHGIVEVDP-----MLTPEERHLNKMQNHGYENPTYKYLEQMI

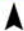

Supplement: MOESM1 [file 9643604]
